# Supplementary material for: Assessment of Outcomes From 1-Year Surveillance After Detection of Early Gastric Cancer Among Patients at High Risk in Japan
Source: PubMed Central journal article supplement (PMC9391963; doi:10.1001/jamanetworkopen.2022.27667), 2022-08-19
Supplement: jamanetwopen-e2227667-s001.pdf [file jamanetwopen-e2227667-s001.pdf]

## Supplementary Online Content

Yamamoto Y, Yoshida N, Yano T, et al. Assessment of outcomes from 1-year surveillance after detection of early gastric cancer among patients with high risk in Japan. *JAMA Netw Open*. 2022;5(8):e2227667. doi:10.1001/jamanetworkopen.2022.27667

**eTable 1.** Lesion Characteristics of Newly Detected Gastric Cancer

**eTable 2.** Clinicopathological Characteristics of Resected Newly Detected Gastric Cancer

**eFigure.** Outcomes of 120 New Gastric Cancer Lesions

This supplementary material has been provided by the authors to give readers additional information about their work.

**eTable 1.** Lesion Characteristics of Newly Detected Gastric Cancer (n = 120)

| Lesion characteristics                   | n (%)     |
|------------------------------------------|-----------|
| Detection interval after index Endoscopy |           |
| within 8 months                          | 32 (26.7) |
| 9-15 months                              | 88 (73.3) |
| Location <sup>a</sup>                    |           |
| Upper                                    | 31 (25.8) |
| Anterior                                 | 8 (6.7)   |
| Lesser curvature                         | 9 (7.5)   |
| Posterior                                | 7 (5.8)   |
| Greater curvature                        | 7 (5.8)   |
| Middle                                   | 46 (38.3) |
| Anterior                                 | 12 (10.0) |
| Lesser curvature                         | 21 (17.5) |
| Posterior                                | 6 (5.0)   |
| Greater curvature                        | 7 (5.8)   |
| Lower                                    | 43 (35.8) |
| Anterior                                 | 9 (7.5)   |
| Lesser curvature                         | 9 (7.5)   |
| Posterior                                | 6 (5.0)   |
| Greater curvature                        | 19 (15.8) |
| Size (endoscopic findings)               |           |
| 10mm ≤                                   | 68 (56.7) |
| 10-20mm                                  | 35 (29.1) |
| 20mm >                                   | 17 (14.2) |
| Color                                    |           |
| Redness                                  | 74 (61.7) |
| No change in color                       | 26 (21.7) |
| Discolored                               | 17 (14.2) |
| Unknown                                  | 3 (2.5)   |
| Macroscopic type <sup>a</sup>            |           |
| Elevated                                 | 18 (15.0) |
| Flat/Depressed                           | 97 (80.8) |
| Unknown                                  | 5 (4.2)   |

<sup>a</sup>Tumor location and macroscopic type were classified according to the Japanese Classification of Gastric Carcinoma.<sup>33</sup>

**eTable 2.** Clinicopathological Characteristics of Resected Newly Detected Gastric Cancer (n = 111)

| Clinicopathologic characteristics                   | n (%)      |
|-----------------------------------------------------|------------|
| Resection method                                    |            |
| Endoscopic resection                                | 100 (90.1) |
| Surgery                                             | 11 (9.9)   |
| Size (pathologic findings)                          |            |
| 10mm $\leq$                                         | 59 (53.1)  |
| 10-20mm                                             | 36 (32.4)  |
| 20mm $>$                                            | 16 (14.4)  |
| Histology <sup>a</sup>                              |            |
| Differentiated                                      | 96 (86.5)  |
| Undifferentiated                                    | 12 (10.8)  |
| Others                                              | 3 (2.7)    |
| Depth of invasion <sup>a</sup>                      |            |
| pT1a                                                | 97 (87.3)  |
| pT1b1                                               | 6 (5.4)    |
| pT1b2                                               | 6 (5.4)    |
| pT2 or deeper                                       | 2 (1.8)    |
| Lymphatic invasion                                  |            |
| Negative                                            | 106 (95.5) |
| Positive                                            | 5 (4.5)    |
| Vascular invasion                                   |            |
| Negative                                            | 107 (96.4) |
| Positive                                            | 4 (3.6)    |
| Endoscopic curative resection criteria <sup>b</sup> |            |
| Within criteria                                     | 100 (90.1) |
| Beyond criteria                                     | 11 (9.9)   |

<sup>a</sup>Histologic classification and depth of invasion were classified according to the Japanese Classification of Gastric Carcinoma.<sup>33</sup>

<sup>b</sup>Endoscopic curative resection was classified according to the Gastric Cancer Treatment Guidelines by Japanese Gastric Cancer Association.

**eFigure.** Outcomes of 120 New Gastric Cancer Lesions

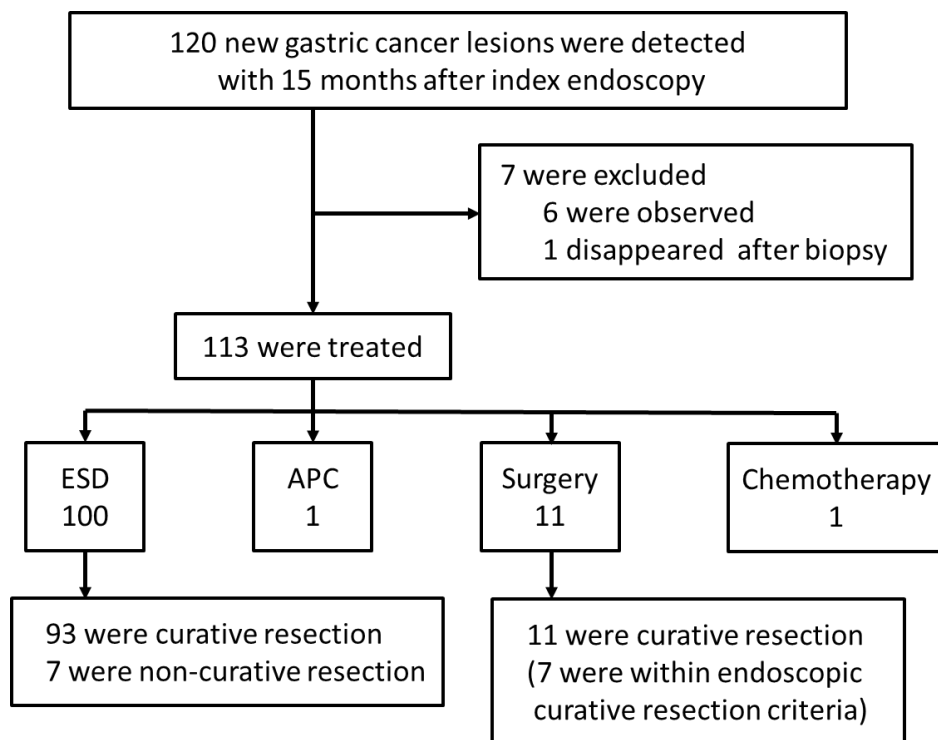

ESD: endoscopic submucosal dissection; APC: argon plasma coagulation
